# Supplementary material for: Synthesis and characterization of cobalt(ii) complexes with tripodal polypyridine ligand bearing pivalamide groups. Selective formation of six- and seven-coordinate cobalt(ii) complexes
Source: Royal Society of Chemistry journal article supplement (doi:10.1039/c2dt12056a), 2012-01-01
Supplement: c2dt12056a.pdf [file c2dt12056a.pdf]

## Supporting Information

### Synthesis and Characterization of Cobalt(II) Complexes with Tripodal Polypyridine Ligand Bearing Pivalamide Groups. Selective Formation of a Six-coordinate and a Seven-coordinate Cobalt(II) Complexes

Jun Matsumoto, Tatsuya Suzuki, Yuji Kajita and Hideki Masuda\*

Department of Frontier Materials, Graduate School of Engineering  
Nagoya Institute of Technology, Showa-ku, Nagoya 466-8555, Japan

[masuda.hideki@nitech.ac.jp](mailto:masuda.hideki@nitech.ac.jp)

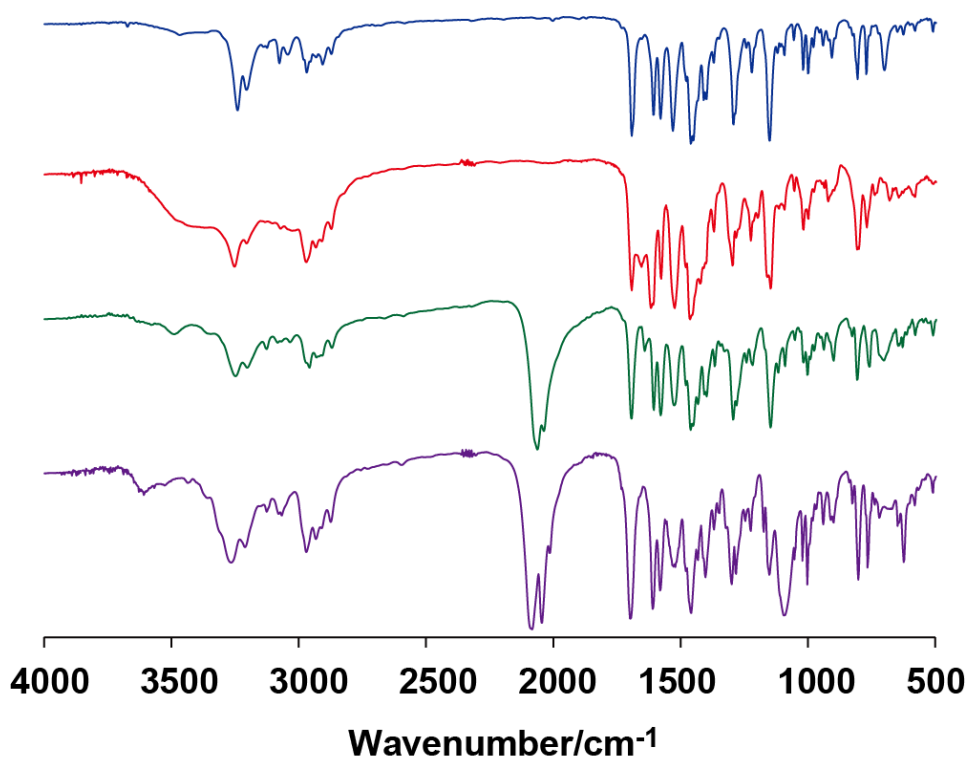

Fig. S1 IR spectra of  $1^{\text{Cl}}$  (blue line),  $1^{\text{Br}}$  (red line),  $1^{\text{azide}}$  (green line),  $3 \cdot (\text{ClO}_4^-)$  (purple line).

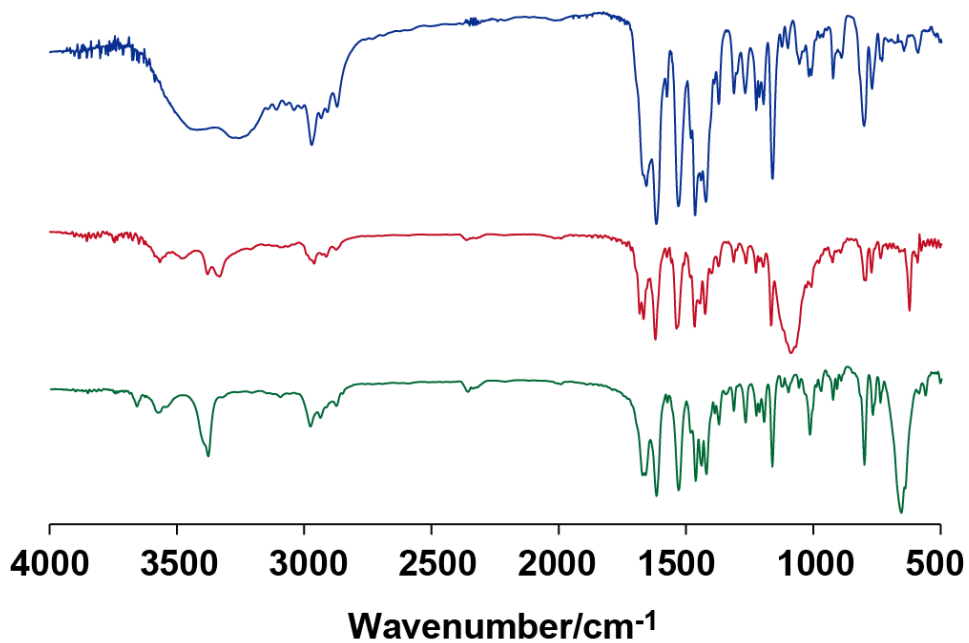

Fig. S2 IR spectra of  $2^{\text{MeCN}} \cdot (\text{I})_2$  (blue line),  $2^{\text{MeOH}} \cdot (\text{ClO}_4)_2$  (red line),  $2^{\text{MeOH}} \cdot (\text{SbF}_6)_2$  (green line).

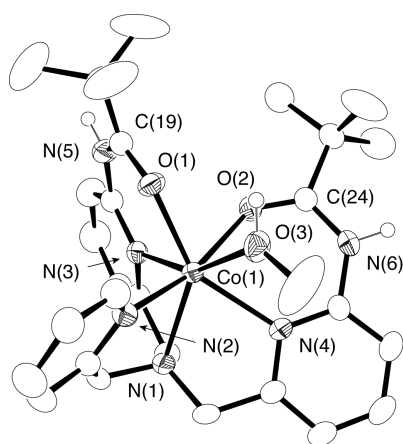

**Fig S3.** ORTEP diagram of the molecular structure of  $2^{\text{MeOH}} \cdot (\text{SbF}_6^-)_2$  with 50% thermal ellipsoid probability. The hydrogen atoms and  $\text{SbF}_6^-$  anion have been omitted for clarity.

**Table S1** Crystallographic and structure refinement data for compounds  $2^{\text{MeOH}} \cdot (\text{SbF}_6^-)_2$

|                  |                                                                            |                                           |              |                         |        |
|------------------|----------------------------------------------------------------------------|-------------------------------------------|--------------|-------------------------|--------|
| Chemical formula | $\text{C}_{29}\text{H}_{40}\text{CoF}_{12}\text{N}_6\text{O}_3\text{Sb}_2$ | $\beta / ^\circ$                          | 121.1594(12) | Independent reflections | 8822   |
| Formula weight   | 1051.09                                                                    | $V / \text{\AA}^3$                        | 7730.5(18)   | $R(\text{int})$         | 0.0338 |
| Crystal system   | Monoclinic                                                                 | $Z$                                       | 8            | $RI(I > 2\sigma(I))^a$  | 0.0370 |
| Space group      | $C2/c$ (#15)                                                               | $D_c / \text{g cm}^{-3}$                  | 1.806        | $RI$ (all)              | 0.0465 |
| $a / \text{\AA}$ | 28.793(4)                                                                  | $\mu(\text{Mo-K}\alpha) / \text{cm}^{-1}$ | 19.065       | $wR2$ (all)             | 0.0898 |
| $b / \text{\AA}$ | 13.5107(17)                                                                | $F(000)$                                  | 4136         | GOF                     | 1.056  |
| $c / \text{\AA}$ | 23.222(4)                                                                  | Reflections collected                     | 30145        | CCDC number             | 851269 |

$$^a R_1 = \frac{\sum ||F_o| - |F_c||}{\sum |F_o|}, wR_2 = \left\{ \frac{\sum [w(F_o^2 - F_c^2)^2]}{\sum [w(F_o^2)]} \right\}^{1/2}.$$

**Table S2** Selected bond lengths [ $\text{\AA}$ ] and angles [ $^\circ$ ] of  $2^{\text{MeOH}} \cdot (\text{SbF}_6^-)_2$

|            |          |                 |            |                 |            |
|------------|----------|-----------------|------------|-----------------|------------|
| Co(1)–N(1) | 2.206(3) | N(1)–Co(1)–N(2) | 74.09(11)  | N(3)–Co(1)–N(4) | 115.00(10) |
| Co(1)–N(2) | 2.200(4) | N(1)–Co(1)–N(3) | 74.60(10)  | N(3)–Co(1)–O(1) | 82.26(9)   |
| Co(1)–N(3) | 2.174(3) | N(1)–Co(1)–N(4) | 72.19(10)  | N(3)–Co(1)–O(2) | 78.36(11)  |
| Co(1)–N(4) | 2.269(3) | N(1)–Co(1)–O(1) | 139.86(10) | N(3)–Co(1)–O(3) | 154.68(10) |
| Co(1)–O(1) | 2.132(2) | N(1)–Co(1)–O(2) | 123.94(11) | N(4)–Co(1)–O(1) | 147.95(9)  |
| Co(1)–O(2) | 2.148(4) | N(1)–Co(1)–O(3) | 130.72(11) | N(4)–Co(1)–O(2) | 76.53(11)  |
| Co(1)–O(3) | 2.243(2) | N(2)–Co(1)–N(3) | 105.83(11) | N(4)–Co(1)–O(3) | 78.27(8)   |
| O(1)–C(19) | 1.234(5) | N(2)–Co(1)–N(4) | 116.04(12) | O(1)–Co(1)–O(2) | 81.35(10)  |
| O(2)–C(24) | 1.219(4) | N(2)–Co(1)–O(1) | 81.50(11)  | O(1)–Co(1)–O(3) | 76.78(8)   |
| N(5)–C(19) | 1.353(5) | N(2)–Co(1)–O(2) | 161.60(8)  | O(2)–Co(1)–O(3) | 84.53(11)  |
| N(6)–C(24) | 1.354(4) | N(2)–Co(1)–O(3) | 85.11(11)  |                 |            |
